# Supplementary material for: First detection of Culex tritaeniorhynchus in Western Australia using molecular diagnostics and morphological identification
Source: PubMed Central journal article supplement (PMC11616137; doi:10.1186/s13071-024-06566-1), 2024-12-04
Supplement: 13071_2024_6566_MOESM1_ESM.pdf [file 13071_2024_6566_MOESM1_ESM.pdf]

**AUSTRALIA**

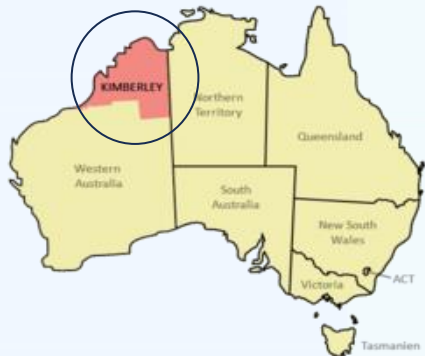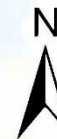

**LEGEND**

- Adult mosquito trap site

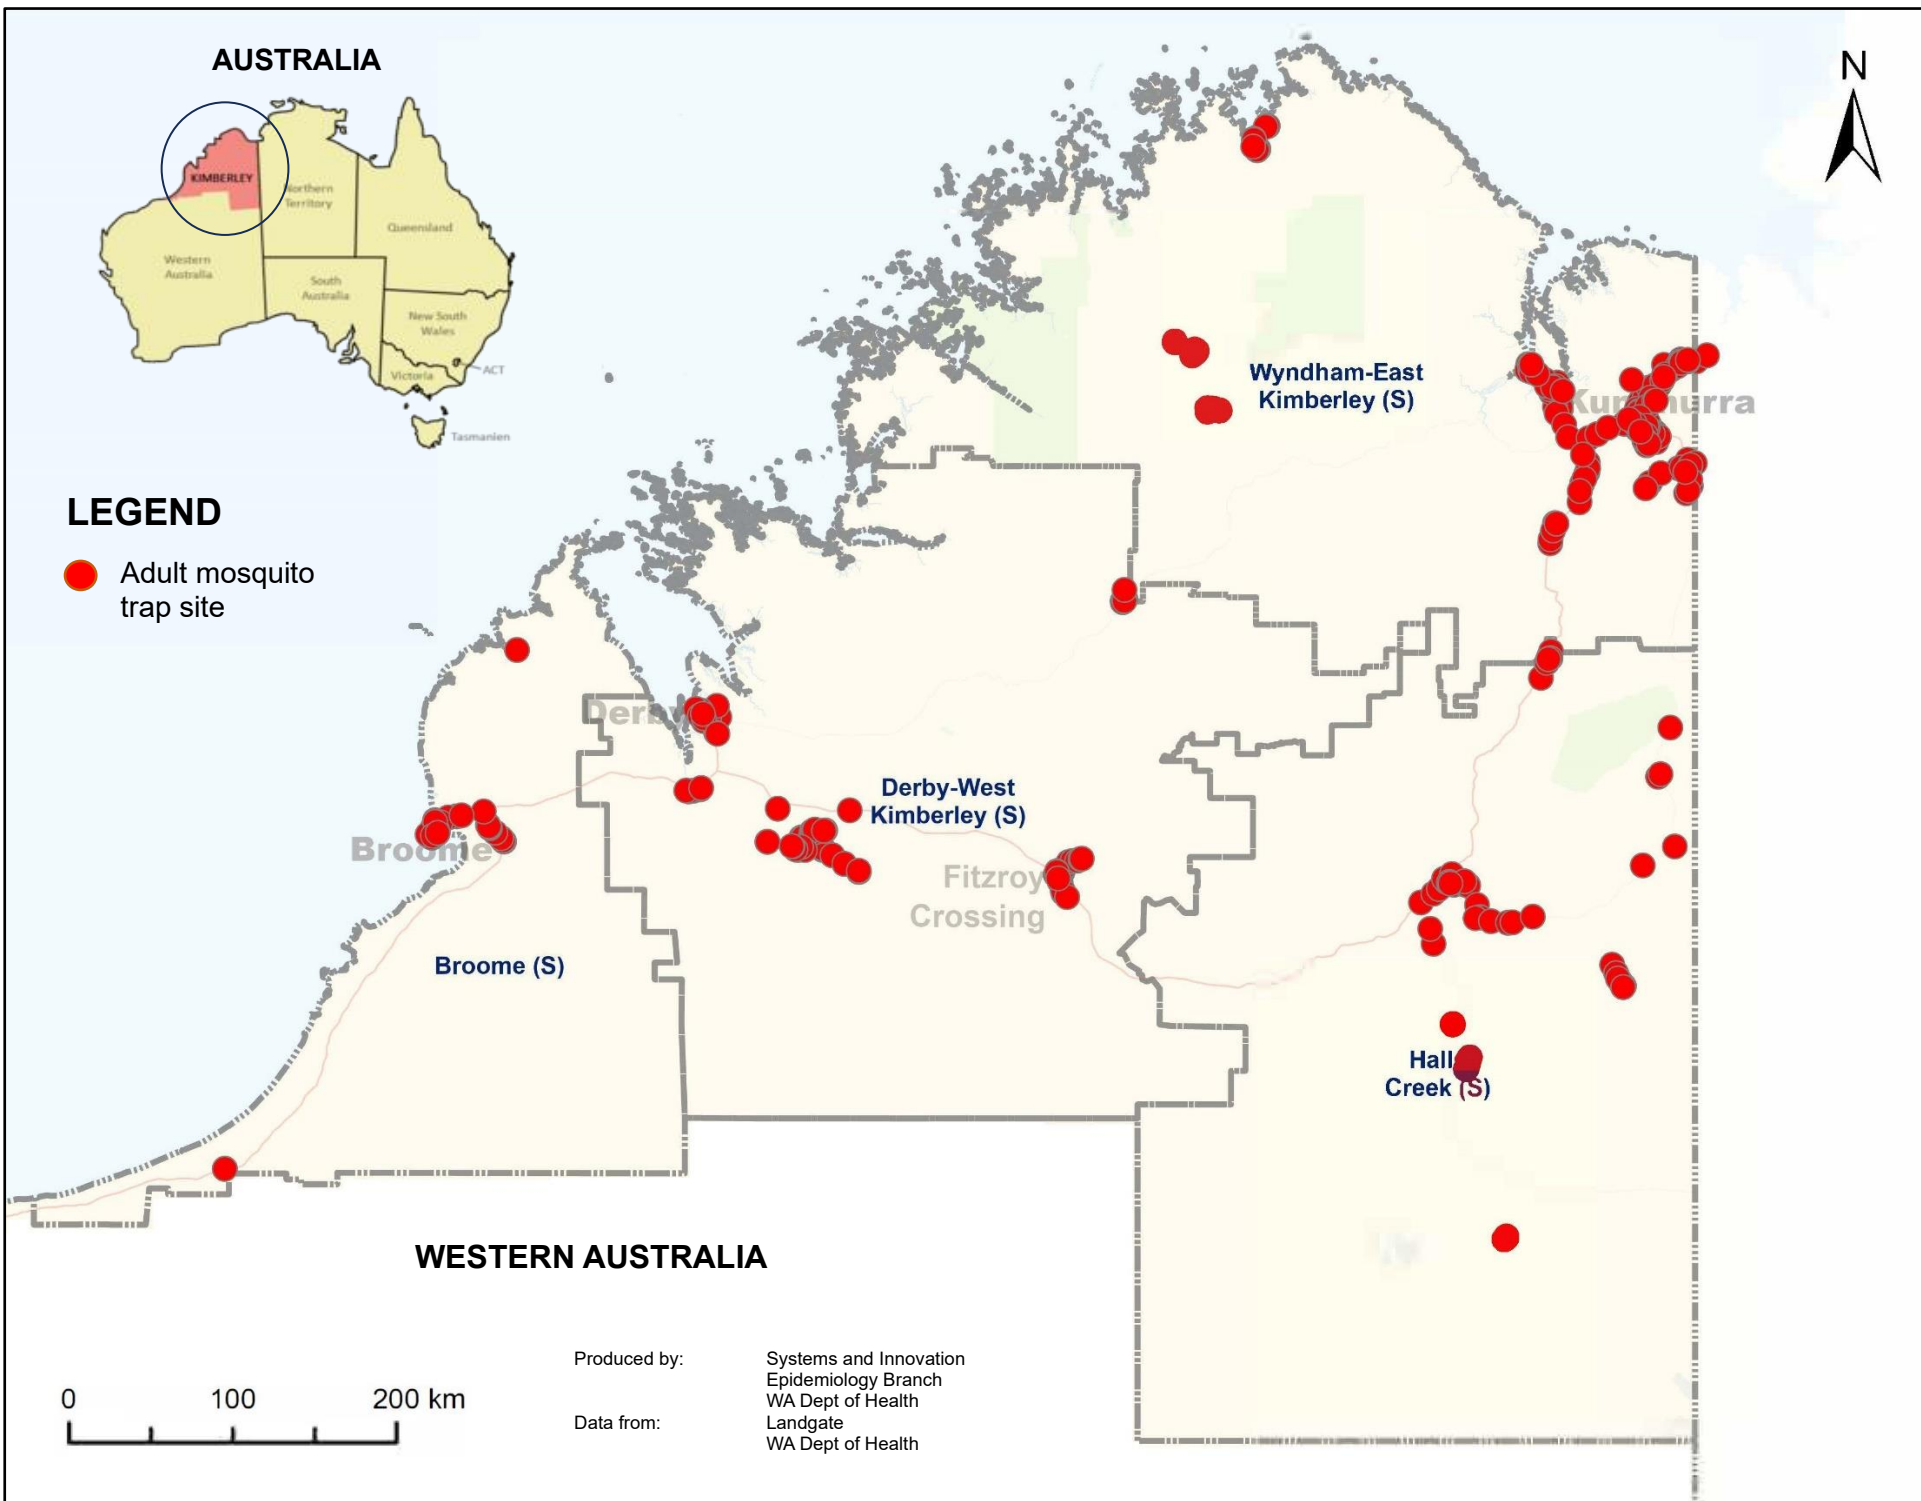

**WESTERN AUSTRALIA**

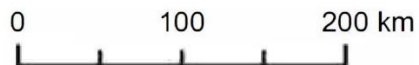

Produced by: Systems and Innovation  
Epidemiology Branch  
WA Dept of Health  
Data from: Landgate  
WA Dept of Health
